# Supplementary material
Source: MDPI journal article supplement (https://www.mdpi.com/2409-515X/7/2/23)
Supplement: s1 [file s1]

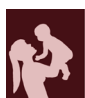

Supplemental material

## Enhanced performance of newborn screening for congenital hypothyroidism by integrating covariate-adjusted results of different tests into CLIR customized interpretive tools

Alexander D. Rowe, Stephanie D. Stoway, et al

**Table S1.** Unadjusted reference percentiles of measured markers

| Marker  | Unit            | 1%ile | 10%ile | 50%ile | 90%ile | 99%ile |
|---------|-----------------|-------|--------|--------|--------|--------|
| TRECs   | copies/ $\mu$ L | 99    | 157    | 382    | 1869   | 3111   |
| GALT    | U/g[Hb]         | 152   | 187    | 262    | 309    | 356    |
| GALT %  | %               | 65    | 80     | 101    | 116    | 126    |
| BIOT F% | %               | 70    | 81     | 100    | 122    | 137    |
| Tyr     | nmol/mL         | 40    | 53     | 82     | 130    | 174    |
| BIOT A  | ERU             | 27    | 34     | 47     | 61     | 71     |
| IRT     | $\mu$ g/dL      | 9.8   | 13     | 22     | 39     | 56     |
| T4      | $\mu$ g/dL      | 9.4   | 12     | 17     | 22     | 25     |
| Cit     | nmol/mL         | 6.3   | 8.4    | 13     | 21     | 26     |
| 17OHP   | ng/dL           | 2.4   | 3.7    | 7.3    | 15     | 22     |
| TSH     | m[UI]/L         | 1.8   | 2.7    | 5.5    | 11.0   | 14     |
| GALC    | nmol/mL/hr      | 1.4   | 2.1    | 4.0    | 7.5    | 11     |
| C16     | nmol/mL         | 1.4   | 1.9    | 2.9    | 4.3    | 5.3    |
| C3      | nmol/mL         | 0.83  | 1.1    | 1.8    | 2.8    | 3.8    |

Legend: Markers are sorted in descending order of the median. Values are shown to include at least two significant figures. Abbreviations (in alphabetical order): 17OHP, 17-hydroxy progesterone; BIOT, Biotinidase activity; C3, propionylcarnitine; CIT, citrulline; C16, palmitoylcarnitine; ERU, enzyme response unit; GALC, galactocerebrosidase activity; GALT, galactose-1-phosphate uridyl transferase activity; IRT, immunoreactive trypsinogen; T4, total thyroxine; TRECS, T-cell receptor excision circles; TSH, thyroid stimulating hormone; TYR, tyrosine.

**Table S2.** Unadjusted reference percentiles of calculated **TSH** ratios.

| <b>Ratio</b> | <b>1%ile</b> | <b>10%ile</b> | <b>50%ile</b> | <b>90%ile</b> | <b>99%ile</b> |
|--------------|--------------|---------------|---------------|---------------|---------------|
| 17OHP/TSH    | 0.350        | 0.600         | 1.360         | 3.240         | 6.230         |
| GALC/TSH     | 0.150        | 0.280         | 0.680         | 1.810         | 4.100         |
| C16/TSH      | 0.140        | 0.230         | 0.510         | 1.230         | 2.100         |
| TSH/T4       | 0.130        | 0.240         | 0.490         | 0.820         | 1.140         |
| C3/TSH       | 0.098        | 0.170         | 0.370         | 0.820         | 1.320         |
| TSH/Cit      | 0.083        | 0.140         | 0.310         | 0.740         | 1.350         |
| TSH/IRT      | 0.056        | 0.110         | 0.260         | 0.590         | 1.000         |
| TSH/BIOT A   | 0.032        | 0.054         | 0.120         | 0.250         | 0.380         |
| TSH/Tyr      | 0.016        | 0.028         | 0.064         | 0.140         | 0.240         |
| TSH/GALT %   | 0.023        | 0.027         | 0.043         | 0.081         | 0.120         |
| TSH/BIOT F%  | 0.022        | 0.027         | 0.042         | 0.080         | 0.120         |
| TSH/GALT     | 0.007        | 0.011         | 0.024         | 0.046         | 0.070         |
| TSH/TRECS    | 0.002        | 0.007         | 0.019         | 0.047         | 0.088         |

Legend: Ratios are sorted in descending order of the median. Values are shown to include three decimal figures. Abbreviations as listed in the legend of supplemental Table 1.

**Table S3.** Unadjusted reference percentiles of calculated **T4** ratios.

| <b>Ratio</b> | <b>1%ile</b> | <b>10%ile</b> | <b>50%ile</b> | <b>90%ile</b> | <b>99%ile</b> |
|--------------|--------------|---------------|---------------|---------------|---------------|
| T4/IRT       | 0.260        | 0.400         | 0.740         | 1.280         | 1.840         |
| Cit/T4       | 0.310        | 0.430         | 0.700         | 1.210         | 2.000         |
| TSH/T4       | 0.130        | 0.240         | 0.490         | 0.820         | 1.140         |
| 17OHP/T4     | 0.150        | 0.230         | 0.430         | 0.840         | 1.540         |
| T4/BIOT A    | 0.160        | 0.250         | 0.360         | 0.520         | 0.700         |
| GALC/T4      | 0.077        | 0.120         | 0.240         | 0.460         | 0.790         |
| T4/Tyr       | 0.077        | 0.120         | 0.210         | 0.360         | 0.500         |
| C16/T4       | 0.077        | 0.110         | 0.170         | 0.270         | 0.370         |
| C3/T4        | 0.045        | 0.064         | 0.110         | 0.180         | 0.270         |
| T4/GALT      | 0.033        | 0.045         | 0.066         | 0.098         | 0.130         |
| T4/TRECS     | 0.004        | 0.006         | 0.013         | 0.033         | 0.069         |

Legend: Ratios are sorted in descending order of the median. Values are shown to include three decimal figures. Abbreviations as listed in the legend of supplemental Table 1.

**Table S4.** Unadjusted extended percentiles of disease ranges for conditions **CH TSH** and **FP TSH**.

|               | Marker      | 1%ile  | 5%ile  | 10%ile | 25%ile | 50%ile | 75%ile | 90%ile | 99%ile |
|---------------|-------------|--------|--------|--------|--------|--------|--------|--------|--------|
| <b>CH TSH</b> |             |        |        |        |        |        |        |        |        |
| <b>HIGH</b>   | TSH         | 23.5   | 26.2   | 28.8   | 35.5   | 76     | 243    | 400    | 777    |
|               | TSH/BIOT A  | 0.43   | 0.51   | 0.63   | 0.83   | 1.68   | 4.96   | 7.63   | 13.63  |
|               | TSH/BIOT F% | 0.27   | 0.33   | 0.39   | 0.55   | 1.97   | 4.33   | 6.17   | 10.12  |
|               | TSH/IRT     | 0.46   | 0.7    | 0.96   | 1.47   | 3.08   | 10.25  | 20.27  | 44.9   |
|               | TSH/CIT     | 1.26   | 1.49   | 1.81   | 2.54   | 5.29   | 15.14  | 24.72  | 72.5   |
|               | TSH/TYR     | 0.18   | 0.27   | 0.32   | 0.47   | 0.99   | 2.6    | 4.49   | 9.75   |
|               | TSH/GALT    | 0.065  | 0.086  | 0.11   | 0.14   | 0.35   | 0.96   | 1.38   | 2.31   |
|               | TSH/GALT%   | 0.26   | 0.31   | 0.32   | 0.46   | 1.54   | 4.56   | 6.61   | 12.51  |
|               | TSH/TRECs   | 0.01   | 0.016  | 0.027  | 0.14   | 0.45   | 1.29   | 2.39   | 5.58   |
| <b>LOW</b>    | 17OHP/TSH   | 0.0075 | 0.015  | 0.022  | 0.046  | 0.1    | 0.23   | 0.39   | 0.87   |
|               | C3/TSH      | 0.0019 | 0.0028 | 0.0038 | 0.0069 | 0.02   | 0.043  | 0.068  | 0.13   |
|               | C16/TSH     | 0.0026 | 0.0042 | 0.0059 | 0.011  | 0.034  | 0.075  | 0.11   | 0.19   |
|               | GALC/TSH    | 0.011  | 0.016  | 0.018  | 0.043  | 0.1    | 0.15   | 0.26   | 0.36   |
| <b>FP TSH</b> |             |        |        |        |        |        |        |        |        |
| <b>HIGH</b>   | TSH         | 24.69  | 25.4   | 25.8   | 27.7   | 31.7   | 42.3   | 66.7   | 113    |
|               | TSH/BIOT A  | 0.36   | 0.43   | 0.47   | 0.56   | 0.71   | 1.07   | 1.62   | 3.00   |
|               | TSH/BIOT F% | 0.19   | 0.22   | 0.23   | 0.27   | 0.34   | 0.39   | 0.51   | 0.67   |
|               | TSH/IRT     | 0.29   | 0.48   | 0.59   | 0.84   | 1.26   | 1.93   | 2.8    | 6.2    |
|               | TSH/CIT     | 0.87   | 1.18   | 1.37   | 1.74   | 2.37   | 3.42   | 4.77   | 9.62   |
|               | TSH/TYR     | 0.16   | 0.21   | 0.25   | 0.32   | 0.44   | 0.67   | 0.99   | 1.79   |
|               | TSH/GALT    | 0.059  | 0.074  | 0.083  | 0.1    | 0.13   | 0.21   | 0.33   | 0.66   |
|               | TSH/GALT%   | 0.25   | 0.26   | 0.27   | 0.31   | 0.33   | 0.39   | 0.47   | 0.56   |
|               | TSH/TRECs   | 0.0087 | 0.011  | 0.013  | 0.023  | 0.054  | 0.11   | 0.23   | 0.51   |
| <b>LOW</b>    | 17OHP/TSH   | 0.073  | 0.12   | 0.15   | 0.21   | 0.3    | 0.44   | 0.62   | 1.14   |
|               | C3/TSH      | 0.0096 | 0.015  | 0.02   | 0.03   | 0.045  | 0.064  | 0.085  | 0.14   |
|               | C16/TSH     | 0.012  | 0.02   | 0.026  | 0.05   | 0.08   | 0.11   | 0.13   | 0.20   |
|               | GALC/TSH    | 0.025  | 0.038  | 0.052  | 0.076  | 0.12   | 0.18   | 0.27   | 0.59   |

**Figure S1.** Plot by Multiple Conditions comparing disease ranges of conditions **CH TSH** and **FP TSH**.

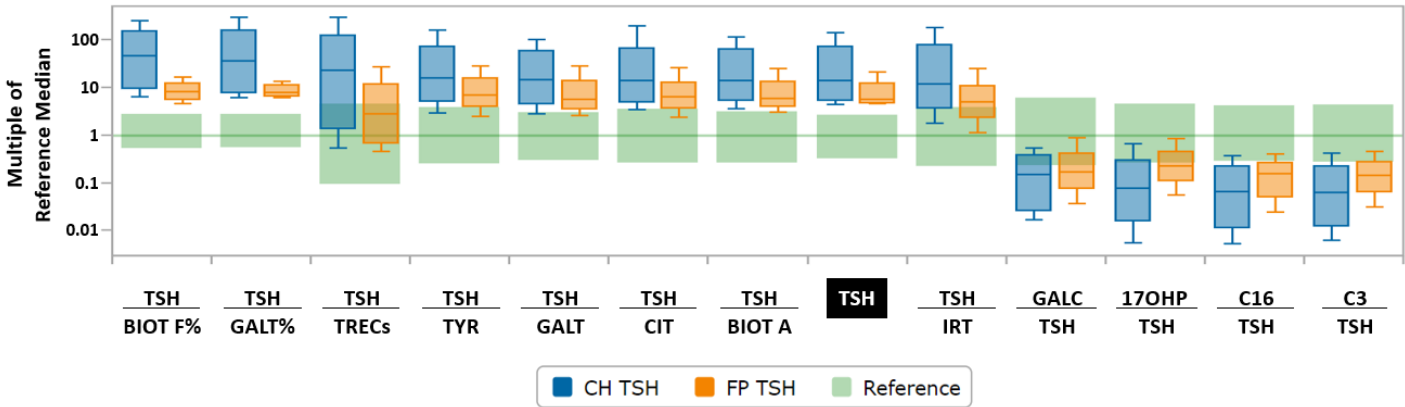

**Table S5.** Unadjusted extended percentiles of disease ranges for conditions **CH T4** and **FP T4**.

|              | Marker    | 1%ile   | 5%ile  | 10%ile | 25%ile | 50%ile | 75%ile | 90%ile | 99%ile |
|--------------|-----------|---------|--------|--------|--------|--------|--------|--------|--------|
| <b>CH T4</b> |           |         |        |        |        |        |        |        |        |
| <b>HIGH</b>  | TSH/T4    | 0.30    | 0.38   | 0.52   | 0.74   | 1.35   | 2.74   | 4.74   | 10.09  |
|              | 17OHP/T4  | 0.26    | 0.30   | 0.43   | 1.47   | 3.84   | 10.40  | 20.09  | 49.6   |
|              | C3/T4     | 0.072   | 0.094  | 0.11   | 0.19   | 0.38   | 0.64   | 1.13   | 1.55   |
|              | C16/T4    | 0.05    | 0.08   | 0.13   | 0.18   | 0.33   | 0.54   | 0.89   | 1.51   |
|              | CIT/T4    | 0.99    | 1.57   | 2.00   | 2.81   | 4.11   | 6.55   | 12.47  | 20.14  |
|              | GALC/T4   | 0.36    | 0.41   | 0.51   | 0.69   | 1.46   | 4.18   | 5.43   | 8.82   |
| <b>LOW</b>   | T4        | 1.07    | 1.14   | 1.58   | 2.21   | 3.98   | 5.22   | 6.97   | 8.01   |
|              | T4/BIOT A | 0.021   | 0.026  | 0.029  | 0.064  | 0.110  | 0.130  | 0.190  | 0.26   |
|              | T4/GALT   | 0.0038  | 0.0045 | 0.0065 | 0.012  | 0.020  | 0.031  | 0.047  | 0.077  |
|              | T4/IRT    | 0.011   | 0.028  | 0.037  | 0.083  | 0.170  | 0.320  | 0.410  | 0.71   |
|              | T4/TRECs  | 0.0011  | 0.0016 | 0.0026 | 0.0034 | 0.0058 | 0.011  | 0.017  | 0.025  |
|              | T4/TYR    | 0.006   | 0.008  | 0.009  | 0.025  | 0.047  | 0.081  | 0.110  | 0.25   |
| <b>FP T4</b> |           |         |        |        |        |        |        |        |        |
| <b>HIGH</b>  | TSH/T4    | 0.20    | 0.29   | 0.34   | 0.51   | 0.86   | 1.5    | 2.31   | 4.57   |
|              | 17OHP/T4  | 0.24    | 0.52   | 0.83   | 1.73   | 4.08   | 9.21   | 17.29  | 44.30  |
|              | C3/T4     | 0.053   | 0.089  | 0.12   | 0.19   | 0.30   | 0.48   | 0.73   | 1.41   |
|              | C16/T4    | 0.054   | 0.09   | 0.12   | 0.18   | 0.27   | 0.4    | 0.56   | 1.07   |
|              | CIT/T4    | 0.95    | 1.37   | 1.63   | 2.35   | 3.67   | 5.58   | 8.20   | 17.18  |
|              | GALC/T4   | 0.20    | 0.35   | 0.49   | 0.87   | 1.89   | 3.72   | 6.19   | 12.88  |
| <b>LOW</b>   | T4        | 1.15    | 1.69   | 2.22   | 3.23   | 4.29   | 5.40   | 7.16   | 8.12   |
|              | T4/BIOT A | 0.029   | 0.047  | 0.059  | 0.083  | 0.12   | 0.17   | 0.24   | 0.41   |
|              | T4/GALT   | 0.0063  | 0.01   | 0.013  | 0.018  | 0.025  | 0.036  | 0.048  | 0.079  |
|              | T4/IRT    | 0.02    | 0.037  | 0.058  | 0.1    | 0.19   | 0.31   | 0.48   | 1      |
|              | T4/TRECs  | 0.00068 | 0.0014 | 0.0018 | 0.003  | 0.0055 | 0.01   | 0.019  | 0.068  |
|              | T4/TYR    | 0.0072  | 0.014  | 0.021  | 0.034  | 0.053  | 0.08   | 0.12   | 0.23   |

**Supplemental Figure S2.** Plot by Multiple Conditions comparing disease ranges of conditions **CH T4** and **FP T4**.

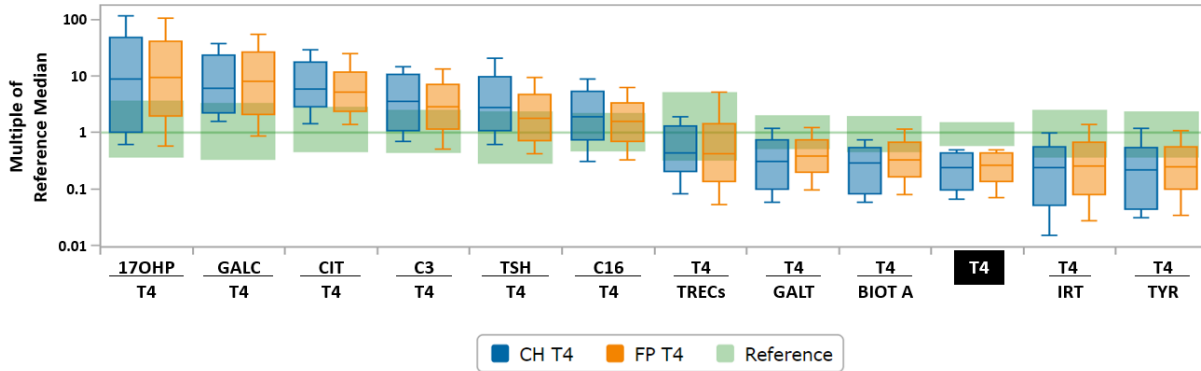

**Table S6.** Unadjusted extended percentiles of disease ranges for conditions **CH TSH T4** and **FP TSH T4**

|                  | Marker     | 1%ile   | 5%ile  | 10%ile | 25%ile | 50%ile | 75%ile | 90%ile | 99%ile |
|------------------|------------|---------|--------|--------|--------|--------|--------|--------|--------|
| <b>CH TSH T4</b> |            |         |        |        |        |        |        |        |        |
| <b>HIGH</b>      | TSH        | 15.06   | 20.66  | 30.9   | 75.4   | 276    | 534    | 687    | 1,180  |
|                  | TSH/T4     | 2.38    | 3.37   | 4.9    | 14.03  | 56.8   | 159    | 294    | 664    |
|                  | TSH/BIOT A | 0.32    | 0.47   | 0.55   | 1.39   | 4.6    | 13.51  | 19.64  | 37     |
|                  | TSH/GALT   | 0.049   | 0.089  | 0.13   | 0.29   | 1.15   | 2.36   | 3.82   | 8.75   |
|                  | TSH/CIT    | 0.84    | 1.42   | 2.09   | 5.44   | 20.25  | 39.5   | 59.6   | 122    |
|                  | TSH/TYR    | 0.12    | 0.25   | 0.42   | 1.12   | 3.05   | 6.14   | 9.08   | 18.4   |
|                  | TSH/IRT    | 0.19    | 0.76   | 1.16   | 3.59   | 13.54  | 30.1   | 45.8   | 102    |
|                  | TSH/TRECs  | 0.0087  | 0.014  | 0.021  | 0.045  | 0.18   | 0.4    | 1      | 2.5    |
|                  | 17OHP/T4   | 0.22    | 0.47   | 0.66   | 1.14   | 2.16   | 4.4    | 9.94   | 36.6   |
|                  | C3/T4      | 0.043   | 0.096  | 0.13   | 0.2    | 0.32   | 0.6    | 0.9    | 1.65   |
|                  | C16/T4     | 0.068   | 0.11   | 0.16   | 0.28   | 0.44   | 0.72   | 1.11   | 2.24   |
|                  | CIT/T4     | 0.75    | 1.01   | 1.21   | 1.79   | 2.93   | 5.24   | 8.68   | 23.72  |
|                  | GALC/T4    | 0.21    | 0.29   | 0.37   | 0.59   | 0.92   | 2.15   | 4.17   | 8.34   |
| <b>LOW</b>       | 17OHP/TSH  | 0.0043  | 0.0095 | 0.012  | 0.02   | 0.037  | 0.11   | 0.33   | 1.53   |
|                  | C3/TSH     | 0.0007  | 0.0014 | 0.0017 | 0.0027 | 0.0055 | 0.017  | 0.051  | 0.11   |
|                  | C16/TSH    | 0.0012  | 0.0017 | 0.0022 | 0.004  | 0.0074 | 0.022  | 0.048  | 0.14   |
|                  | GALC/TSH   | 0.0029  | 0.0035 | 0.0053 | 0.01   | 0.032  | 0.11   | 0.28   | 0.89   |
|                  | T4         | 1.02    | 1.42   | 1.84   | 2.83   | 4.62   | 6.92   | 8.26   | 9.29   |
|                  | T4/BIOT A  | 0.024   | 0.033  | 0.042  | 0.064  | 0.11   | 0.14   | 0.2    | 0.26   |
|                  | T4/GALT    | 0.0038  | 0.0056 | 0.0075 | 0.012  | 0.022  | 0.034  | 0.047  | 0.073  |
|                  | T4/IRT     | 0.021   | 0.049  | 0.074  | 0.13   | 0.22   | 0.37   | 0.51   | 0.94   |
|                  | T4/TRECs   | 0.00086 | 0.0015 | 0.0018 | 0.0027 | 0.0047 | 0.0075 | 0.015  | 0.034  |
|                  | T4/TYR     | 0.0095  | 0.014  | 0.018  | 0.03   | 0.057  | 0.092  | 0.13   | 0.25   |
| <b>FP TSH T4</b> |            |         |        |        |        |        |        |        |        |
| <b>HIGH</b>      | TSH        | 14.53   | 15.94  | 18.12  | 26.2   | 43.9   | 63.2   | 81.1   | 140    |
|                  | TSH/T4     | 2.04    | 2.7    | 3.17   | 4.45   | 6.69   | 9.11   | 11.93  | 22.84  |
|                  | TSH/BIOT A | 0.3     | 0.4    | 0.48   | 0.71   | 1.17   | 1.63   | 2.31   | 4.6    |
|                  | TSH/GALT   | 0.045   | 0.063  | 0.081  | 0.12   | 0.2    | 0.29   | 0.42   | 0.9    |
|                  | TSH/CIT    | 0.69    | 0.98   | 1.2    | 1.91   | 3.14   | 4.53   | 6.2    | 12.1   |
|                  | TSH/TYR    | 0.12    | 0.17   | 0.22   | 0.34   | 0.61   | 0.92   | 1.27   | 2.25   |
|                  | TSH/IRT    | 0.087   | 0.22   | 0.35   | 0.71   | 1.41   | 2.77   | 4.44   | 9.73   |
|                  | TSH/TRECs  | 0.0057  | 0.011  | 0.012  | 0.018  | 0.026  | 0.047  | 0.081  | 0.5    |
|                  | 17OHP/T4   | 0.49    | 0.89   | 1.2    | 1.96   | 3.19   | 5.2    | 7.89   | 18.69  |
|                  | C3/T4      | 0.072   | 0.1    | 0.12   | 0.16   | 0.22   | 0.32   | 0.43   | 0.79   |
|                  | C16/T4     | 0.098   | 0.13   | 0.15   | 0.2    | 0.27   | 0.38   | 0.49   | 0.77   |
|                  | CIT/T4     | 0.74    | 1.05   | 1.24   | 1.65   | 2.14   | 2.93   | 3.92   | 7.43   |
|                  | GALC/T4    | 0.23    | 0.3    | 0.35   | 0.58   | 1.04   | 2.32   | 4.13   | 9.68   |
| <b>LOW</b>       | 17OHP/TSH  | 0.066   | 0.13   | 0.17   | 0.27   | 0.47   | 0.89   | 1.5    | 3.55   |
|                  | C3/TSH     | 0.0071  | 0.011  | 0.015  | 0.022  | 0.034  | 0.059  | 0.089  | 0.17   |
|                  | C16/TSH    | 0.0085  | 0.014  | 0.019  | 0.026  | 0.041  | 0.067  | 0.11   | 0.2    |
|                  | GALC/TSH   | 0.026   | 0.05   | 0.066  | 0.14   | 0.23   | 0.48   | 0.94   | 1.88   |
|                  | T4         | 2.36    | 3.51   | 4.09   | 5.33   | 7.07   | 8.09   | 8.89   | 9.4    |
|                  | T4/BIOT A  | 0.071   | 0.088  | 0.1    | 0.13   | 0.17   | 0.21   | 0.25   | 0.41   |
|                  | T4/GALT    | 0.011   | 0.015  | 0.017  | 0.022  | 0.029  | 0.037  | 0.048  | 0.083  |
|                  | T4/IRT     | 0.016   | 0.035  | 0.059  | 0.13   | 0.23   | 0.37   | 0.56   | 1.06   |
|                  | T4/TRECs   | 0.0011  | 0.0019 | 0.0024 | 0.0041 | 0.006  | 0.01   | 0.019  | 0.05   |
|                  | T4/TYR     | 0.026   | 0.038  | 0.047  | 0.068  | 0.091  | 0.12   | 0.14   | 0.22   |

**Figure S3.** Plot by Multiple Conditions comparing disease ranges of conditions **CH** TSH T4 and FP TSH T4.

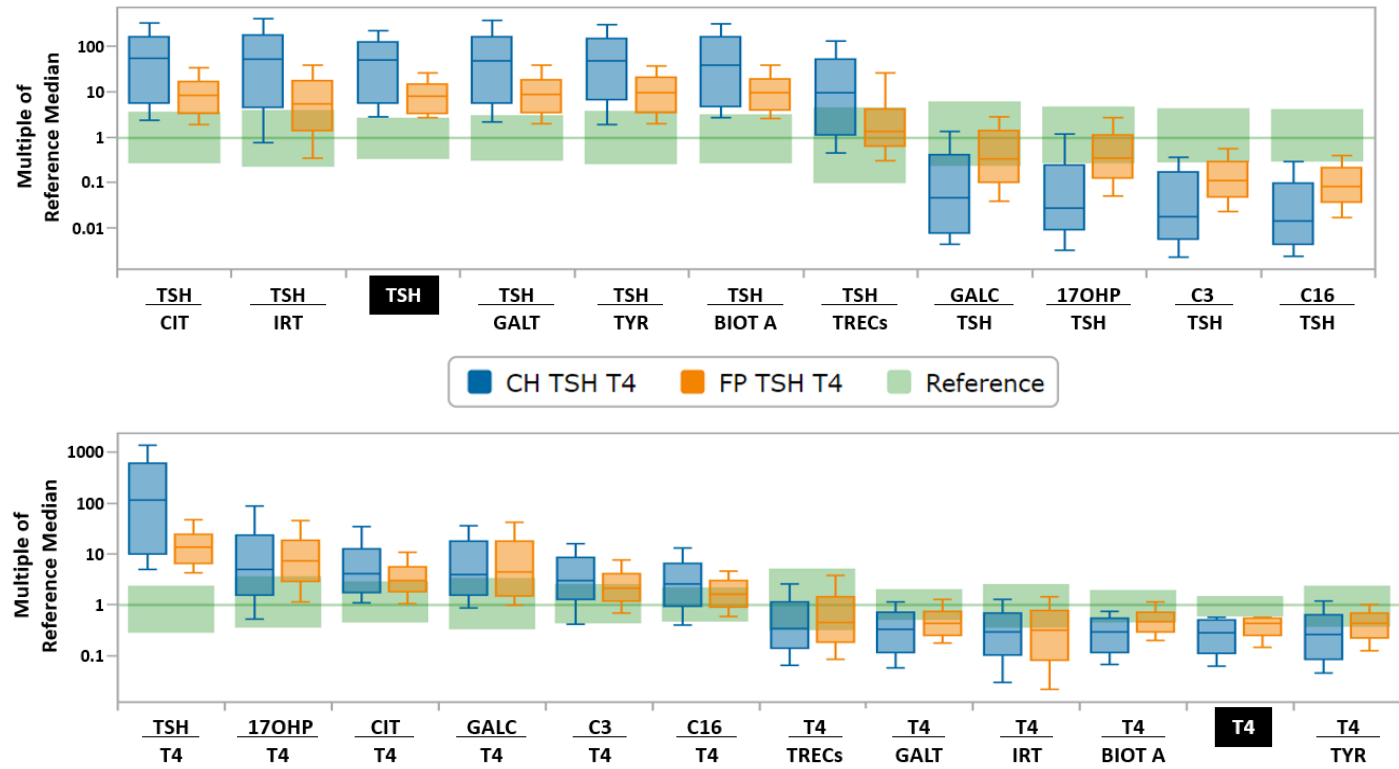

Figure S4. Single Condition Tool for condition CH TSH for location California.

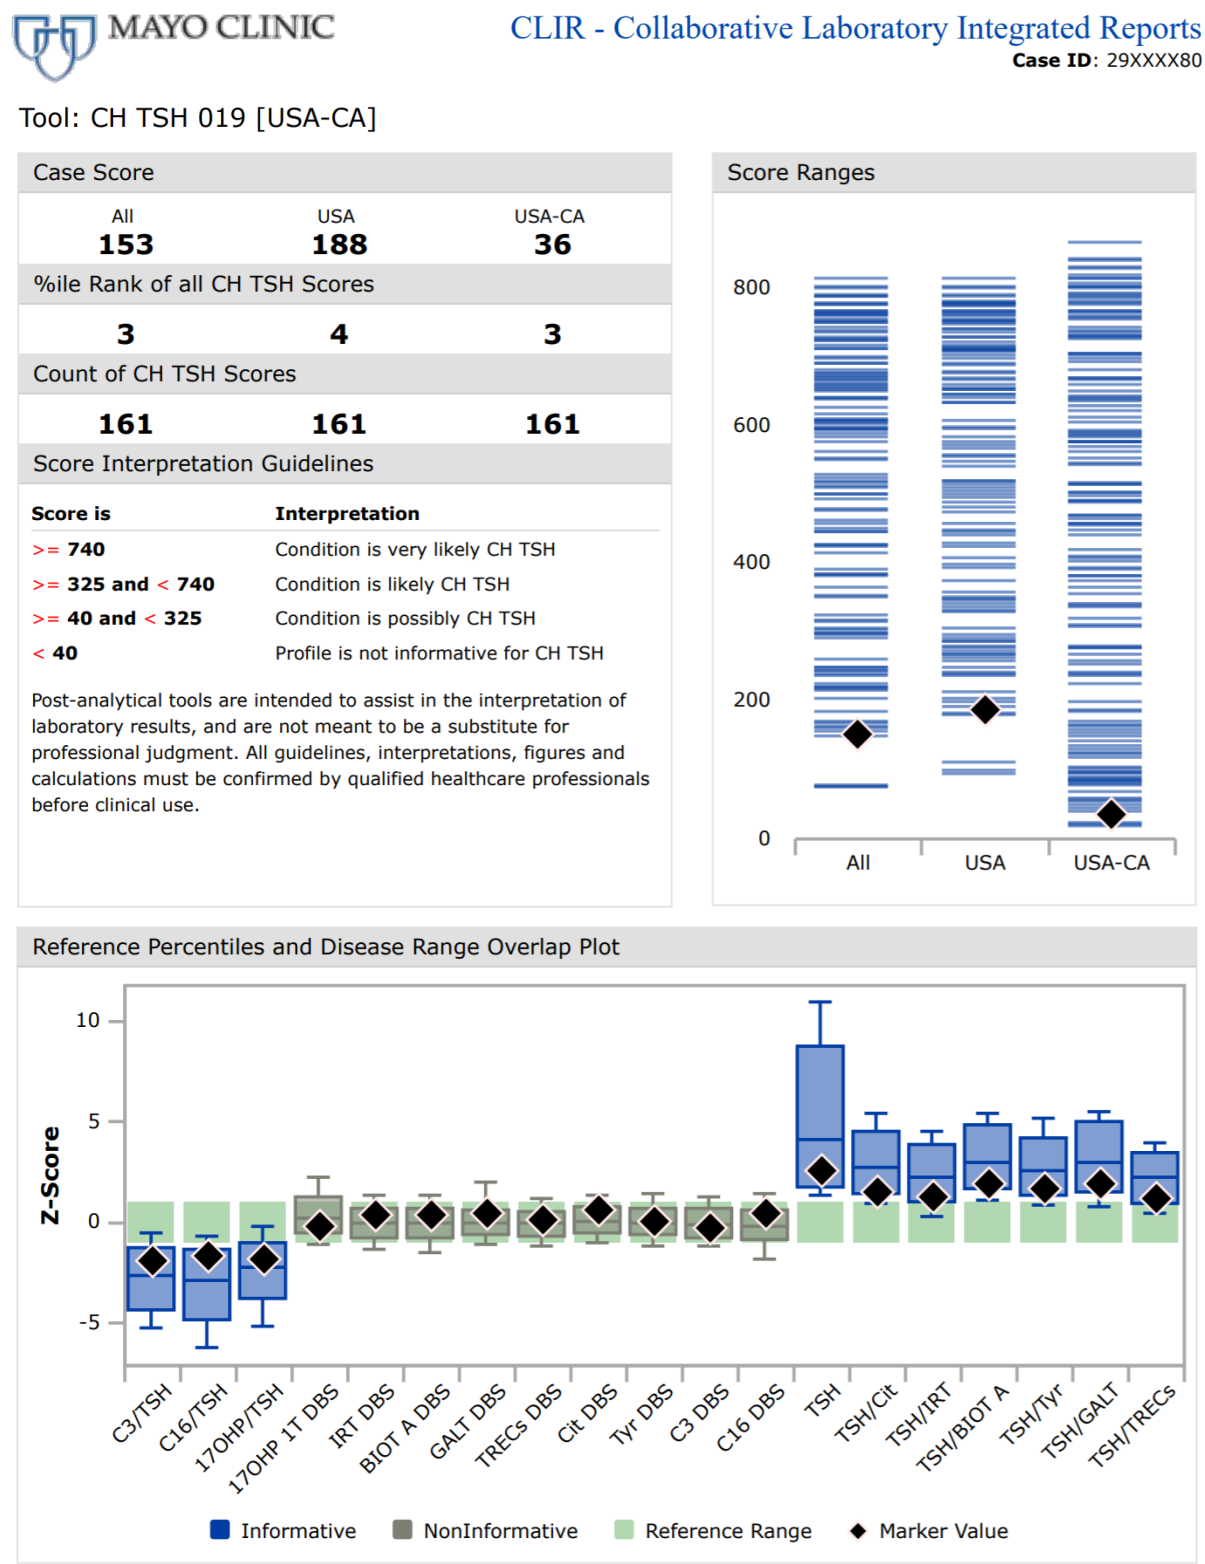

(continued, Figure S4)

| Reference Percentiles and Disease Range Overlap Values |           |        |         |                                         |       |        |       |       |       |          |
|--------------------------------------------------------|-----------|--------|---------|-----------------------------------------|-------|--------|-------|-------|-------|----------|
| Markers                                                |           | RR     | Overlap | Informative Disease Range Scoring %iles |       |        |       |       | Case  | Adjusted |
| Low                                                    | Unit      | 10%ile | %ile    | 99                                      | 95    | 90     | 85    | 50    | Value | Value    |
| C3/TSH                                                 | Ratio     | -1.3   | 1.0     | -1.3                                    | -2.27 | -2.89  | -3.2  | -5.89 | 0.05  | -4.16    |
| C16/TSH                                                | Ratio     | -1.31  | 0.5     | -1.59                                   | -2.48 | -3     | -3.47 | -6.53 | 0.12  | -3.66    |
| 17OHP/TSH                                              | Ratio     | -1.32  | 3.1     | -0.45                                   | -1.58 | -2.44  | -2.74 | -5.16 | 0.3   | -4.28    |
| High                                                   | Unit      | 90%ile | %ile    | 1                                       | 5     | 10     | 15    | 50    | Case  | Adjusted |
| TSH                                                    | m[IU]/L   | 0.99   | 0.0     | 2.52                                    | 2.96  | 3.37   | 3.8   | 8.38  | 32.3  | 5.18     |
| TSH/Cit                                                | Ratio     | 1.31   | 0.2     | 2.09                                    | 2.57  | 3.28   | 3.53  | 6.16  | 1.35  | 3.55     |
| TSH/IRT                                                | Ratio     | 1.28   | 3.7     | 0.62                                    | 1.58  | 2.13   | 2.53  | 4.88  | 1.01  | 2.85     |
| TSH/BIOT A                                             | Ratio     | 1.28   | 0.0     | 2.26                                    | 2.96  | 3.5    | 3.81  | 6.53  | 0.56  | 4.2      |
| TSH/Tyr                                                | Ratio     | 1.31   | 0.2     | 1.92                                    | 2.43  | 3      | 3.37  | 5.78  | 0.34  | 3.86     |
| TSH/GALT                                               | Ratio     | 1.3    | 0.6     | 1.59                                    | 2.56  | 3.22   | 3.69  | 6.55  | 0.1   | 4.31     |
| TSH/TRECs                                              | Ratio     | 1.35   | 3.0     | 1.03                                    | 1.75  | 2.09   | 2.5   | 5.31  | 0.11  | 2.91     |
|                                                        |           | RR     | RR      | Differentiator Disease Range %iles      |       |        |       |       |       |          |
| Differentiator                                         | Unit      | 10%ile | 90%ile  | 1                                       | 10    | 50     | 90    | 99    | Case  | Adjusted |
| 17OHP 1T DBS                                           | ng/mL     | -1.3   | 1.35    | -2.37                                   | -1.19 | 0.54   | 3.08  | 5.49  | 9.55  | -0.38    |
| IRT DBS                                                | ug/L      | -1.27  | 1.43    | -2.68                                   | -1.58 | -0.075 | 1.61  | 2.95  | 31.9  | 0.93     |
| BIOT A DBS                                             | ERU       | -1.44  | 1.26    | -3.62                                   | -1.92 | -0.03  | 1.37  | 2.62  | 57.5  | 0.82     |
| GALT DBS                                               | U/g[Hb]   | -1.35  | 1.27    | -2.55                                   | -1.5  | -0.083 | 1.55  | 4.78  | 310   | 1.19     |
| TRECs DBS                                              | copies/uL | -1.44  | 1.22    | -2.94                                   | -1.85 | -0.096 | 1.16  | 2.48  | 302   | 0.36     |
| Cit DBS                                                | nmol/mL   | -1.34  | 1.33    | -2.4                                    | -1.25 | 0.21   | 1.68  | 3.08  | 24    | 1.51     |
| Tyr DBS                                                | nmol/mL   | -1.33  | 1.39    | -2.57                                   | -1.41 | -0.031 | 1.6   | 3.2   | 94.2  | 0.16     |
| C3 DBS                                                 | nmol/mL   | -1.32  | 1.37    | -2.6                                    | -1.75 | -0.18  | 1.55  | 2.84  | 1.6   | -0.53    |
| C16 DBS                                                | nmol/mL   | -1.38  | 1.31    | -4.24                                   | -2.09 | -0.37  | 1.29  | 2.95  | 3.99  | 1.02     |
|                                                        |           |        |         | RR - DR Overlap                         |       |        |       |       |       |          |
| Covariate                                              |           | Value  |         |                                         |       |        |       |       |       |          |
| Age hr                                                 |           | 28     |         |                                         |       |        |       |       |       |          |
| BW                                                     |           | 4030   |         |                                         |       |        |       |       |       |          |
| Sex                                                    |           | Male   |         |                                         |       |        |       |       |       |          |



**Figure S5.** Reference range comparison of unadjusted and adjusted values for marker TRECs.

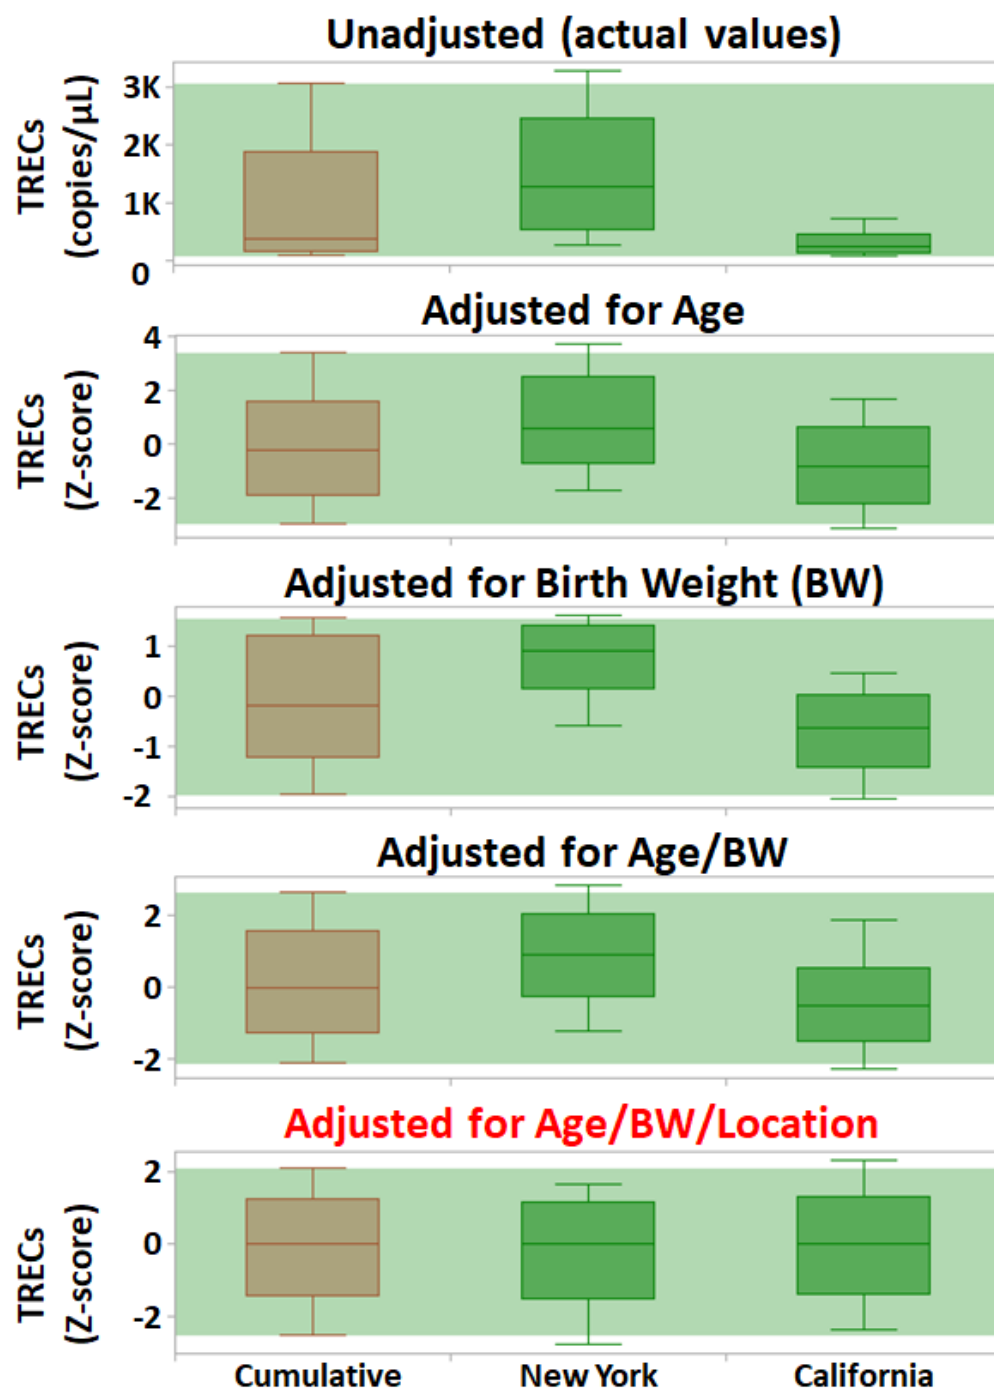

Legend: New York N=353,322; California N=520,539.

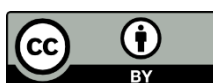

© 2021 by the authors. Submitted for possible open access publication under the terms and conditions of the Creative Commons Attribution (CC BY) license (<http://creativecommons.org/licenses/by/4.0/>).
